# Supplementary material for: Photochemical conversion of nitrate to ammonium ions by a newly developed photo-reductive titanium dioxide catalyst: implications on nitrogen recovery
Source: Royal Society of Chemistry journal article supplement (doi:10.1039/d3ew00523b), 2023-01-01
Supplement: d3ew00523b1.pdf [file d3ew00523b1.pdf]

## Supporting Information

### **Photochemical Conversion of Nitrate to Ammonium Ion by a Newly Developed Photo- Reductive Titanium Dioxide Catalyst: Implications on Nitrogen Recovery**

Andrew Sanchez<sup>1</sup>, Zuyang Ye<sup>2</sup>, Yadong Yin<sup>2</sup> and Haizhou Liu<sup>1,\*</sup>

Department of Chemical and Environmental Engineering, University of California at Riverside,

Riverside CA 92521 USA

Department of Chemistry, University of California at Riverside, Riverside CA 92521 USA

\* Corresponding author, email: [haizhou@engr.ucr.edu](mailto:haizhou@engr.ucr.edu)

Phone: (951) 827-2076, fax (951) 827-5696.

Number of pages: 10

Number of figures: 5

Number of tables: 2

## Table of Contents

|                                                                                                                                                                                                                                                                             |     |
|-----------------------------------------------------------------------------------------------------------------------------------------------------------------------------------------------------------------------------------------------------------------------------|-----|
| <b>Table S1.</b> Composition of synthetic groundwater used in this study. ....                                                                                                                                                                                              | S3  |
| <b>Table S2.</b> Nitrate removal efficiency by photo-reduction $\text{TiO}_2$ in DI water and synthetic groundwater matrix.* .....                                                                                                                                          | S4  |
| <b>Text S1.</b> Ammonia Measurements .....                                                                                                                                                                                                                                  | S5  |
| <b>Figure S1.</b> UV-Vis for DEG-doped $\text{TiO}_2$ nanoparticles synthesized at $230^\circ\text{C}$ and for industrial $\text{TiO}_2$ catalyst P25 both at 50 mg/L and Irradiance spectra output for the medium-pressure UV lamp used to conduct all experiments. ....   | S6  |
| <b>Figure S2.</b> Transmission Electron Microscopy micrograph of synthesized photo-reductive $\text{TiO}_2$ nanocrystals with different heating time for hydrolysis at $230^\circ\text{C}$ . (A) 3 hours; (B) 6 hours; (C) 9 hours.....                                     | S7  |
| <b>Figure S3.</b> Nitrogen speciation profile during photochemical nitrate reactions in the presence of photo-oxidative P25 Degussa $\text{TiO}_2$ catalyst. [Nitrate] = 1.6 mM, [ $\text{TiO}_2$ ] = 50 mg/L. pH = 7. ....                                                 | S8  |
| <b>Figure S4.</b> Nitrogen speciation profile for nitrate solution in the catalyst control experiment in the absence of photocatalyst and only with UV irradiation. [Nitrate] = 1.6 mM, [ $\text{TiO}_2$ ] = 50 mg/L, pH = 7.....                                           | S9  |
| <b>Figure S5.</b> Nitrogen speciation profile for nitrate solution during photochemical reactions in the presence of synthesized DEG- $\text{TiO}_2$ catalyst. Synthesis temperature = $230^\circ\text{C}$ , [Nitrate] = 1.6 mM, [ $\text{TiO}_2$ ] = 50 mg/L, pH = 7. .... | S10 |

**Table S1.** Composition of synthetic groundwater used in this study.

| Chemical composition* | Concentration (mg/L) |
|-----------------------|----------------------|
| Nitrate               | 100                  |
| Chloride              | 13                   |
| Bicarbonate           | 38                   |
| Sulfate               | 33                   |
| Silica                | 37                   |
| Sodium                | 14                   |
| Potassium             | 4                    |
| Calcium               | 24                   |
| Magnesium             | 6                    |
| TOC                   | 4.5                  |
| pH                    | 8.0                  |

\* The synthetic groundwater chemical composition was based on reported values in literature (Ottofuelling, S.; Von Der Kammer, F.; Hofmann, T. Commercial Titanium Dioxide Nanoparticles in Both Natural and Synthetic Water: Comprehensive Multidimensional Testing and Prediction of Aggregation Behavior. *Environ. Sci. Technol.* **2011**, 45 (23), 10045–10052.)

**Table S2.** Nitrate removal efficiency by photo-reduction  $\text{TiO}_2$  in DI water and synthetic groundwater matrix.\*

| <b>Water Matrix</b>   | <b>Nitrate Removal Efficiency (%)</b> | <b>Selectivity of ammonium ion (%)</b> | <b>Formation of nitrite (%)</b> |
|-----------------------|---------------------------------------|----------------------------------------|---------------------------------|
| DI Water              | 95                                    | 70                                     | Not detected                    |
| Synthetic Groundwater | 99                                    | 60                                     | Not detected                    |

\*Nitrate removal, nitrite formation and ammonia selectivity data represent samples collected at 5 hours of the photocatalytic reaction.

### **Text S1. Ammonia Measurements**

Phenol Reagent is prepared by adding 1.1 mL of liquified phenol to 9.9 mL of 200 proof ethanol in a tube. Sodium Nitroprusside is prepared by transferring 500 mg of sodium nitroprusside to a 100 mL flask and transferring the solution to a stock bottle. Alkaline Citrate is prepared by adding 10 g of sodium citrate anhydrous to a 50 mL volumetric flask, followed by 500 mg of sodium hydroxide. 10 mL of this solution is added to 2.5 mL of sodium hypochlorite to prepare a solution of hypochlorous alkaline citrate. 85  $\mu$ L of sample is added to 765  $\mu$ L of DI water, followed by 34  $\mu$ L of phenol solution, 34  $\mu$ L of sodium nitroprusside and 85  $\mu$ L of hypochlorous alkaline citrate solution. The sample is kept for 1 hour and read at 640 nm.

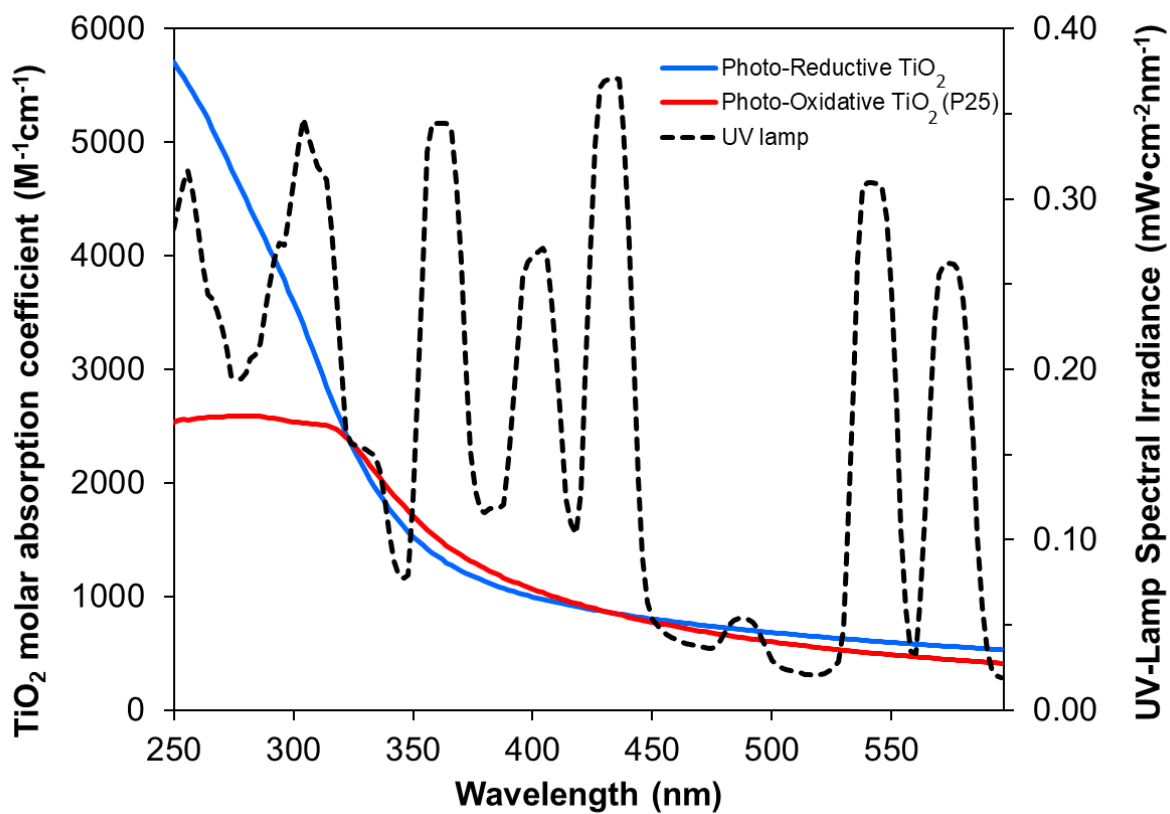

**Figure S1.** UV-Vis for DEG-doped TiO<sub>2</sub> nanoparticles synthesized at 230°C and for industrial TiO<sub>2</sub> catalyst P25 both at 50 mg/L and irradiance spectra output for the medium-pressure UV lamp used to conduct all experiments.

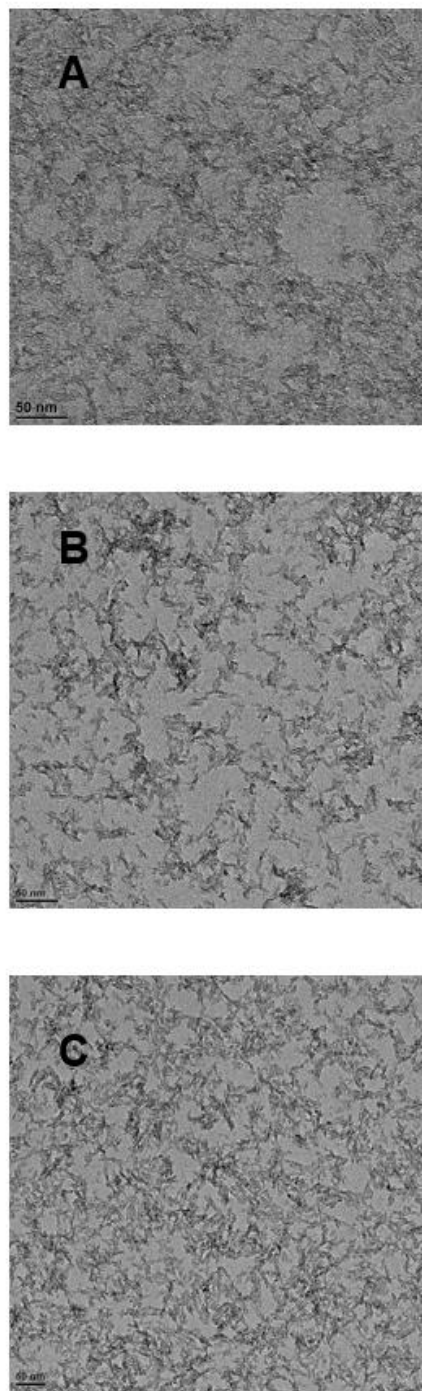

**Figure S2.** Transmission Electron Microscopy micrograph of synthesized photo-reductive  $\text{TiO}_2$  nanocrystals with different heating time for hydrolysis at  $230^\circ\text{C}$ . (A) 3 hours; (B) 6 hours; (C) 9 hours.

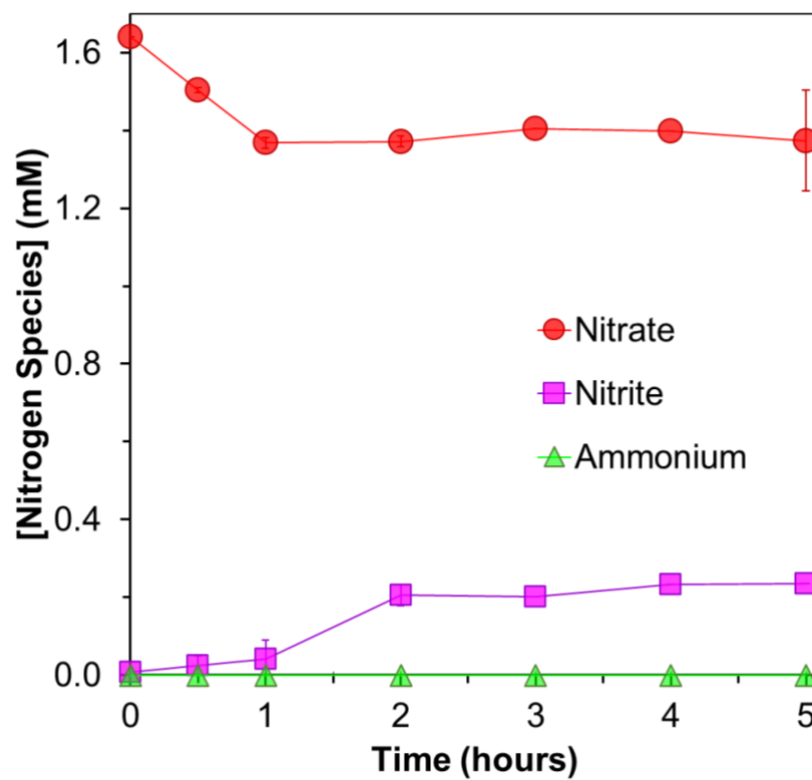

**Figure S3.** Nitrogen speciation profile during photochemical nitrate reactions in the presence of photo-oxidative P25 Degussa  $\text{TiO}_2$  catalyst.  $[\text{Nitrate}] = 1.6 \text{ mM}$ ,  $[\text{TiO}_2] = 50 \text{ mg/L}$ .  $\text{pH} = 7$ .



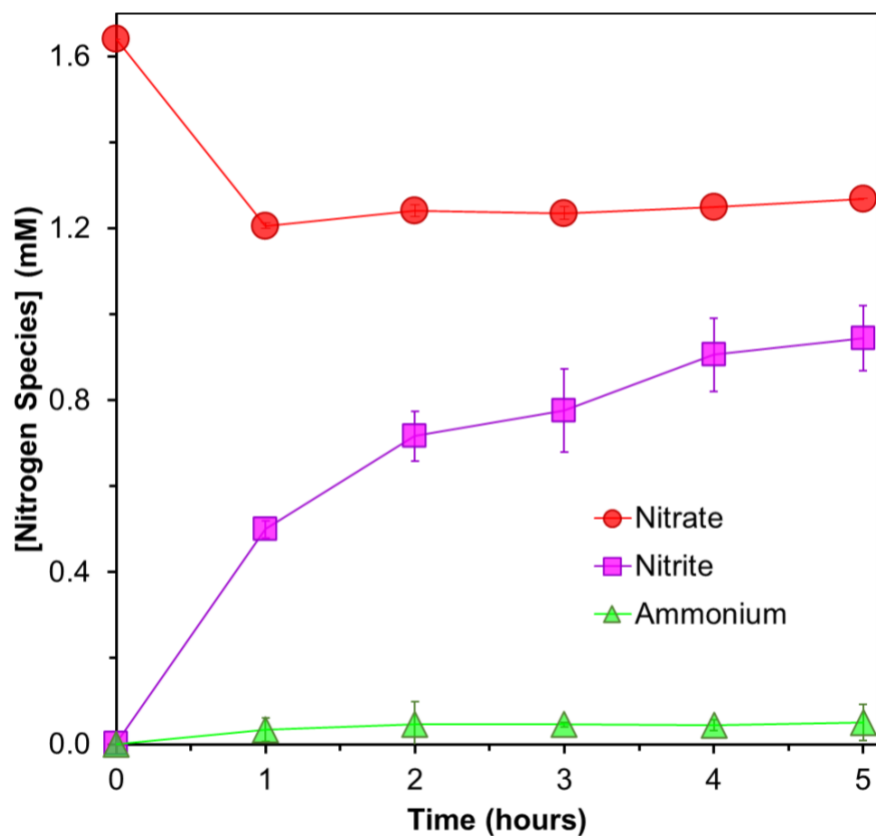

**Figure S4.** Nitrogen speciation profile for nitrate solution in the catalyst control experiment in the absence of photocatalyst and only with UV irradiation. [Nitrate] = 1.6 mM, [TiO<sub>2</sub>] = 50 mg/L, pH = 7.

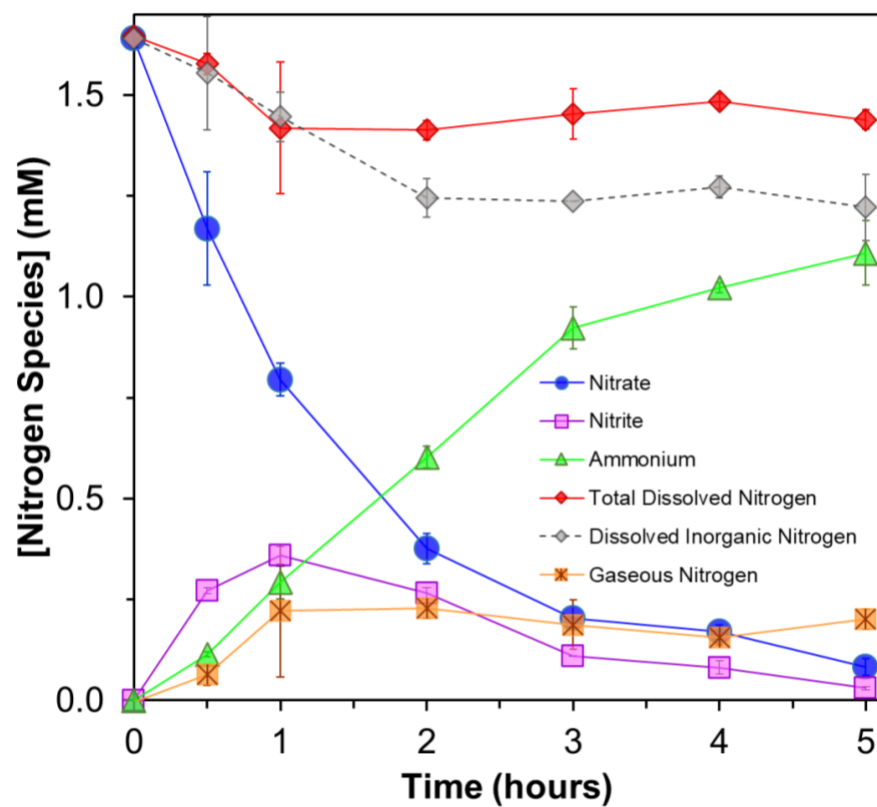

**Figure S5.** Nitrogen speciation profile for nitrate solution during photochemical reactions in the presence of synthesized DEG-TiO<sub>2</sub> catalyst. Synthesis temperature = 230°C, [Nitrate] = 1.6 mM, [TiO<sub>2</sub>] = 50 mg/L, pH = 7.
